# Supplementary material for: Pharmacokinetic/Pharmacodynamic Evaluation of a New Purine-2,6-Dione Derivative in Rodents with Experimental Autoimmune Diseases
Source: MDPI journal article supplement (doi:10.3390/pharmaceutics14051090), 2022-05-19
Supplement: s1 [file s1]

```

C*****
C                                ADAPT                                *
C                                Version 5                            *
C*****
C                                *
C    The PK/PD EAE progression model of compound 34
C    Developed by Dr. Artur Świerczek
C                                *
C*****

C#####C

    Subroutine SYMBOL
    Implicit None

    Include 'globals.inc'
    Include 'model.inc'

CC
C-----C
C                                Enter as Indicated                                C
C-----C

    NDEqs   = 44    ! Enter # of Diff. Eqs.
    NSParam = 5     ! Enter # of System Parameters.
    NVparam = 2     ! Enter # of Variance Model Parameters.
    NSecPar = 0     ! Enter # of Secondary Parameters.
    NSecOut = 0     ! Enter # of Secondary Outputs (not used).
    Ieqsol  = 1     ! Indicates a built-in compartment model.
    Descr   = 'PK/PD encephalomyelitis progression model of compound 34'

CC
C-----C
C    Enter Symbol for Each System Parameter (eg. PSym(1)='Kel')    C
C-----C

    PSym(1) = 'tau'
    PSym(2) = 'kin'
    PSym(3) = 'kout'
    PSym(4) = 'ic50'
    PSym(5) = 'kt'

CC
C-----C
C    Enter Symbol for Each Variance Parameter {eg: PVsym(1)='Sigma'} C
C-----C

    PVsym(1) = 'SDinter'
    PVsym(2) = 'SDslope'

CC
C-----C
C    Enter Symbol for Each Secondary Parameter {eg: PSsym(1)='CLt'} C
C-----C

```

```

C-----C
C-----C
C

```

```

Return
End

```

```

C#####C

```

```

Subroutine DIFFEQ(T,X,XP)
Implicit None

```

```

Include 'globals.inc'
Include 'model.inc'

```

```

Real*8 T,X(MaxNDE),XP(MaxNDE)
Real*8 Tau, kin, kout, Response, P1, P2, P3, P4, P5, P6, P7, P8
Real*8 P9, P10, P11, P12, P13, P14, P15, P16, P17, P18, P19, P20
Real*8 P21, P22, P23, P24, P25, P26, P27, P28, P29, P30
Real*8 P31, P32, P33, P34, P35, P36, P37, P38
Real*8 dResponse, dP1, dP2, dP3, dP4, dP5, dP6, dP7, dP8, dP9, dP20
Real*8 dP10, dP11, dP12, dP13, dP14, dP15, dP16, dP17, dP18, dP19
Real*8 dP21, dP22, dP23, dP24, dP25, dP26, dP27, dP28, dP29, dP30
Real*8 dP31, dP32, dP33, dP34, dP35, dP36, dP37, dP38
Real*8 dAp, dXpl, Cp, Xpl, Ap, IC50, Response34, dResponse34
Real*8 Dt1, Dt2, dT3, T1, kt

```

```

C-----C
C   Enter Differential Equations Below {e.g. XP(1) = -P(1)*X(1)} C
C-----C

```

```

Tau = P(1) !Mean transit time of disease progression precursor
kin = P(2) !Disease progression rate constant
kout = P(3) !Disease remission rate constant
IC50 = P(4) !Compound 34 concentration resulting in 50% inhibition of disease
progression
kt = P(5) !Serum-effect-site equilibration rate constant

```

```

P1 = X(1)
P2 = X(2)
P3 = X(3)
P4 = X(4)
P5 = X(5)
P6 = X(6)
P7 = X(7)
P8 = X(8)
P9 = X(9)
P10 = X(10)
P11 = X(11)
P12 = X(12)
P13 = X(13)
P14 = X(14)
P15 = X(15)
P16 = X(16)
P17 = X(17)
P18 = X(18)
P19 = X(19)
P20 = X(20)

```

P21 = X(21)  
 P22 = X(22)  
 P23 = X(23)  
 P24 = X(24)  
 P25 = X(25)  
 P26 = X(26)  
 P27 = X(27)  
 P28 = X(28)  
 P29 = X(29)  
 P30 = X(30)  
 P31 = X(31)  
 P32 = X(32)  
 P33 = X(33)  
 P34 = X(34)  
 P35 = X(35)  
 P36 = X(36)  
 P37 = X(37)  
 P38 = X(38)

Response = X(39)  
 Response34 = X(40)

Ap = X(41)  
 Xp1 = X(42)  
 T1 = X(43)

! Differential equations

! Pharmacokinetics:

dAp=-216\*Ap  
 dXp1=216\*Ap-67.7\*Xp1  
 Cp=Xp1/21.69  
 dT1=(Cp-T1)\*kt

! Pharmacodynamics and disease progression:

dResponse = kin\*(P20+P38)-kout\*Response  
 dResponse34 = kin\*(P20+P38)\*(1-T1/(IC50+T1))-kout\*Response34

dP1 = (-1/Tau\*P1)  
 dP2 = (P1-P2)/Tau  
 dP3 = (P2-P3)/Tau  
 dP4 = (P3-P4)/Tau  
 dP5 = (P4-P5)/Tau  
 dP6 = (P5-P6)/Tau  
 dP7 = (P6-P7)/Tau  
 dP8 = (P7-P8)/Tau  
 dP9 = (P8-P9)/Tau  
 dP10 = (P9-P10)/Tau  
 dP11 = (P10-P11)/Tau  
 dP12 = (P11-P12)/Tau  
 dP13 = (P12-P13)/Tau  
 dP14 = (P13-P14)/Tau  
 dP15 = (P14-P15)/Tau  
 dP16 = (P15-P16)/Tau  
 dP17 = (P16-P17)/Tau  
 dP18 = (P17-P18)/Tau  
 dP19 = (P18-P19)/Tau  
 dP20 = (P19-P20)/Tau  
 dP21 = (P20-P21)/Tau  
 dP22 = (P21-P22)/Tau  
 dP23 = (P22-P23)/Tau

$dP24 = (P23 - P24) / \text{Tau}$   
 $dP25 = (P24 - P25) / \text{Tau}$   
 $dP26 = (P25 - P26) / \text{Tau}$   
 $dP27 = (P26 - P27) / \text{Tau}$   
 $dP28 = (P27 - P28) / \text{Tau}$   
 $dP29 = (P28 - P29) / \text{Tau}$   
 $dP30 = (P29 - P30) / \text{Tau}$   
 $dP31 = (P30 - P31) / \text{Tau}$   
 $dP32 = (P31 - P32) / \text{Tau}$   
 $dP33 = (P32 - P33) / \text{Tau}$   
 $dP34 = (P33 - P34) / \text{Tau}$   
 $dP35 = (P34 - P35) / \text{Tau}$   
 $dP36 = (P35 - P36) / \text{Tau}$   
 $dP37 = (P36 - P37) / \text{Tau}$   
 $dP38 = (P37 - P38) / \text{Tau}$

$XP(1) = dP1$   
 $XP(2) = dP2$   
 $XP(3) = dP3$   
 $XP(4) = dP4$   
 $XP(5) = dP5$   
 $XP(6) = dP6$   
 $XP(7) = dP7$   
 $XP(8) = dP8$   
 $XP(9) = dP9$   
 $XP(10) = dP10$   
 $XP(11) = dP11$   
 $XP(12) = dP12$   
 $XP(13) = dP13$   
 $XP(14) = dP14$   
 $XP(15) = dP15$   
 $XP(16) = dP16$   
 $XP(17) = dP17$   
 $XP(18) = dP18$   
 $XP(19) = dP19$   
 $XP(20) = dP20$   
 $XP(21) = dP21$   
 $XP(22) = dP22$   
 $XP(23) = dP23$   
 $XP(24) = dP24$   
 $XP(25) = dP25$   
 $XP(26) = dP26$   
 $XP(27) = dP27$   
 $XP(28) = dP28$   
 $XP(29) = dP29$   
 $XP(30) = dP30$   
 $XP(31) = dP31$   
 $XP(32) = dP32$   
 $XP(33) = dP33$   
 $XP(34) = dP34$   
 $XP(35) = dP35$   
 $XP(36) = dP36$   
 $XP(37) = dP37$   
 $XP(38) = dP38$   
 $XP(39) = dResponse$  !Control group  
 $XP(40) = dResponse34$  !Compound 34-treated group  
 $XP(41) = dAp$   
 $XP(42) = dXp1$

XP(43) = dT1

```
C-----C
C-----C
C
    Return
    End

C#####C

    Subroutine OUTPUT(Y,T,X)
        Implicit None

        Include 'globals.inc'
        Include 'model.inc'

        Real*8 Y(MaxNOE),T,X(MaxNDE)
        Real*8

CC
C-----C
C    Enter Output Equations Below    {e.g. Y(1) = X(1)/P(2) }    C
C-----C

C    Note: X(1), X(2) and X(3) are the amounts in the central, absorption
C    and peripheral compartments, respectively.

        Y(1)=X(39)
        Y(2)=X(40)

C-----C
C-----C
C
    Return
    End

C#####C

    Subroutine VARMOD(V,T,X,Y)
        Implicit None

        Include 'globals.inc'
        Include 'model.inc'

        Real*8 V(MaxNOE),T,X(MaxNDE),Y(MaxNOE)

CC
C-----C
C    Enter Variance Model Equations Below    C
C    {e.g. V(1) = (PV(1) + PV(2)*Y(1))**2 }    C
C-----C

        V(1) = (PV(1) + PV(2)*Y(1))**2
        V(2) = (PV(1) + PV(2)*Y(2))**2

C-----C
C-----C
```

```

Return
End

C#####C

Subroutine COVMOD(Pmean, ICmean, PC)
C Defines any covariate model equations (MLEM, ITS)
Implicit None

Include 'globals.inc'
Include 'model.inc'

Real*8 PC(MaxNCP)
Real*8 Pmean(MaxNSP+MaxNDE), ICmean(MaxNDE)

CC
C-----C
C Enter # of Covariate Parameters C
C---C-----C

NCparam = 0 ! Enter # of Covariate Parameters.

CC
C-----C
C Enter Symbol for Covariate Params {eg: PCsym(1)='CLRenal'} C
C---C-----C

CC
C-----C
C For the Model Params. that Depend on Covariates Enter the Equation C
C {e.g. Pmean(1) = PC(1)*R(2) } C
C---C-----C

C-----C
C-----C
C

Return
End

C#####C

Subroutine POPINIT(PmeanI,ICmeanI,PcovI,ICcovI, PCI)
C Initial parameter values for population program parameters (ITS, MLEM)

Implicit None

Include 'globals.inc'
Include 'model.inc'

Integer I,J
Real*8 PmeanI(MaxNSP+MaxNDE), ICmeanI(MaxNDE)
Real*8 PcovI(MaxNSP+MaxNDE,MaxNSP+MaxNDE), ICcovI(MaxNDE,MaxNDE)
Real*8 PCI(MaxNCP)

CC
C-----C

```

```

C Enter Initial Values for Population Means C
C { e.g. PmeanI(1) = 10.0 } C
C-----C-----C-----C-----C

CC
C-----C-----C-----C-----C
C Enter Initial Values for Pop. Covariance Matrix (Lower Triang.) C
C { e.g. PcovI(2,1) = 0.25 } C
C-----C-----C-----C-----C

CC
C-----C-----C-----C-----C
C Enter Values for Covariate Model Parameters C
C { e.g. PCI(1) = 2.0 } C
C-----C-----C-----C-----C

C-----C-----C-----C-----C
C-----C-----C-----C-----C
C
Return
End

C#####C

Subroutine PRIOR(Pmean,Pcov,ICmean,ICcov)
C Parameter mean and covariance values for MAP estimation (ID,NPD,STS)
Implicit None

Include 'globals.inc'
Include 'model.inc'

Integer I,J
Real*8 Pmean(MaxNSP+MaxNDE), ICmean(MaxNDE)
Real*8 Pcov(MaxNSP+MaxNDE,MaxNSP+MaxNDE), ICcov(MaxNDE,MaxNDE)

CC
C-----C-----C-----C-----C
C Enter Nonzero Elements of Prior Mean Vector C
C { e.g. Pmean(1) = 10.0 } C
C-----C-----C-----C-----C

CC
C-----C-----C-----C-----C
C Enter Nonzero Elements of Covariance Matrix (Lower Triang.) C
C { e.g. Pcov(2,1) = 0.25 } C
C-----C-----C-----C-----C

C-----C-----C-----C-----C
C-----C-----C-----C-----C
C
Return
End

```

```

C#####C

      Subroutine SPARAM(PS,P,IC)
      Implicit None

      Include 'globals.inc'

      Real*8 PS(MaxNSECP), P(MaxNSP+MaxNDE), IC(MaxNDE)

CC
C-----C
C      Enter Equations Defining Secondary Paramters          C
C      { e.g. PS(1) = P(1)*P(2) }                             C
C-----C-----C

C-----C
C-----C
C
      Return
      End

C#####C

      Subroutine AMAT(A)
      Implicit None

      Include 'globals.inc'
      Include 'model.inc'

      Integer I,J
      Real*8 A(MaxNDE,MaxNDE)

      DO I=1,Ndeqs
        DO J=1,Ndeqs
          A(I,J)=0.0D0
        End Do
      End Do

CC
C-----C
C      Enter non zero elements of state matrix {e.g. A(1,1) = -P(1) } C
C-----C-----C

C-----C
C-----C
C
      Return
      End

C#####C

```
